# Supplementary material
Source: Springer Nature journal article supplement (https://www.springermedizin.de/resource/supplementary/13054_2010_8813_MOESM2_ESM.pdf/9732632)

Mean dPELOD

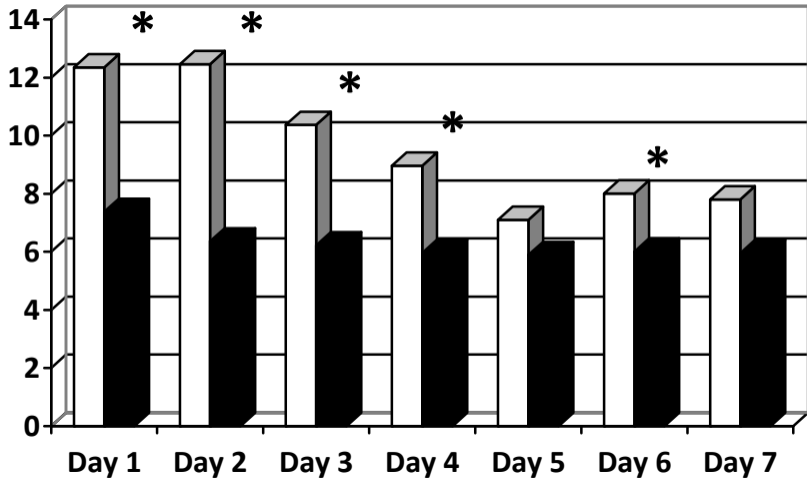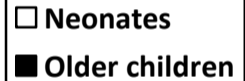

Supplement: MOESM2 [file 9732632]
